# Supplementary material for: Trade and competitiveness of African sugar exports
Source: Frontiers journal article supplement (doi:10.3389/fsufs.2023.1304383), 2023-12-15
Supplement: Data_Sheet_1.xlsx [file Data_Sheet_1.xlsx]

## Sheet: Detailed Country data
Country Code	Country	Year	NRCA
1	Morocco	2001	-0.00405567
1	Morocco	2002	-0.00392498
1	Morocco	2003	-0.00359752
1	Morocco	2004	-0.00282262
1	Morocco	2005	-0.00444174
1	Morocco	2006	-0.00474646
1	Morocco	2007	-0.00350389
1	Morocco	2008	-0.00316808
1	Morocco	2009	-0.00436879
1	Morocco	2010	-0.00471177
1	Morocco	2011	-0.00483501
1	Morocco	2012	-0.00414898
1	Morocco	2013	-0.0039277
1	Morocco	2014	-0.00329751
1	Morocco	2015	0.00258297
1	Morocco	2016	0.00878945
1	Morocco	2017	0.0105569
1	Morocco	2018	0.00678264
1	Morocco	2019	0.00988231
1	Morocco	2020	0.0146525
1	Morocco	2021	0.0143764
2	Eswatini	2001	0.0161975
2	Eswatini	2002	0.0120666
2	Eswatini	2003	0.0207628
2	Eswatini	2004	0.0234192
2	Eswatini	2005	0.021846
2	Eswatini	2006	0.0355249
2	Eswatini	2007	0.0187496
2	Eswatini	2008	0.000592006
2	Eswatini	2009	0.0116927
2	Eswatini	2010	0.00607239
2	Eswatini	2011	0.0237391
2	Eswatini	2012	0.0284411
2	Eswatini	2013	0.0272571
2	Eswatini	2014	0.0221606
2	Eswatini	2015	0.0232648
2	Eswatini	2016	0.0227306
2	Eswatini	2017	0.0205882
2	Eswatini	2018	0.0207218
2	Eswatini	2019	0.0285625
2	Eswatini	2020	0.0257397
2	Eswatini	2021	0.0224678
3	South Africa	2001	0.062937
3	South Africa	2002	0.0371288
3	South Africa	2003	0.0323958
3	South Africa	2004	0.0270619
3	South Africa	2005	0.0298323
3	South Africa	2006	0.0391089
3	South Africa	2007	0.0232585
3	South Africa	2008	0.0119475
3	South Africa	2009	0.0261864
3	South Africa	2010	0.0185122
3	South Africa	2011	0.00959731
3	South Africa	2012	0.0121698
3	South Africa	2013	0.0164238
3	South Africa	2014	0.0172316
3	South Africa	2015	0.00113647
3	South Africa	2016	-0.00295875
3	South Africa	2017	0.00527461
3	South Africa	2018	0.0152103
3	South Africa	2019	0.0247098
3	South Africa	2020	0.0141926
3	South Africa	2021	0.00581188
4	Mauritius	2001	0.0666235
4	Mauritius	2002	0.063969
4	Mauritius	2003	0.0577702
4	Mauritius	2004	0.0582849
4	Mauritius	2005	0.0523362
4	Mauritius	2006	0.0481199
4	Mauritius	2007	0.033763
4	Mauritius	2008	0.0270436
4	Mauritius	2009	0.0221936
4	Mauritius	2010	0.0227899
4	Mauritius	2011	0.0221979
4	Mauritius	2012	0.0192101
4	Mauritius	2013	0.0218955
4	Mauritius	2014	0.0173719
4	Mauritius	2015	0.0166716
4	Mauritius	2016	0.017957
4	Mauritius	2017	0.0169421
4	Mauritius	2018	0.00967925
4	Mauritius	2019	0.0129527
4	Mauritius	2020	0.0122721
4	Mauritius	2021	0.00943668
5	Egypt	2001	-0.00115504
5	Egypt	2002	-0.00206705
5	Egypt	2003	-7.9738e-05
5	Egypt	2004	-0.000644426
5	Egypt	2005	0.000314016
5	Egypt	2006	0.000149008
5	Egypt	2007	0.00317249
5	Egypt	2008	-0.00207594
5	Egypt	2009	0.00329302
5	Egypt	2010	0.0219099
5	Egypt	2011	0.00940647
5	Egypt	2012	0.00219824
5	Egypt	2013	0.00528024
5	Egypt	2014	0.00358811
5	Egypt	2015	0.00497249
5	Egypt	2016	0.0175633
5	Egypt	2017	0.00979056
5	Egypt	2018	0.00872564
5	Egypt	2019	0.00242421
5	Egypt	2020	0.00256572
5	Egypt	2021	0.00238209
6	Algeria	2001	-0.000162218
6	Algeria	2002	-0.000186863
6	Algeria	2003	-0.000180348
6	Algeria	2004	-0.000237502
6	Algeria	2005	-0.000302083
6	Algeria	2006	1.4841e-05
6	Algeria	2007	-2.35075e-06
6	Algeria	2008	-0.000184876
6	Algeria	2009	0.000399619
6	Algeria	2010	0.0213701
6	Algeria	2011	0.0196319
6	Algeria	2012	0.0152411
6	Algeria	2013	0.0192767
6	Algeria	2014	0.0156283
6	Algeria	2015	0.0113935
6	Algeria	2016	0.0172909
6	Algeria	2017	0.0153294
6	Algeria	2018	0.0102218
6	Algeria	2019	0.0126324
6	Algeria	2020	0.0160526
6	Algeria	2021	0.0149897
7	Zambia	2001	0.00846043
7	Zambia	2002	0.00679916
7	Zambia	2003	0.00557688
7	Zambia	2004	0.00491558
7	Zambia	2005	0.0103075
7	Zambia	2006	0.00713137
7	Zambia	2007	0.00869279
7	Zambia	2008	0.00494158
7	Zambia	2009	0.00931869
7	Zambia	2010	0.0119992
7	Zambia	2011	0.00982535
7	Zambia	2012	0.00686934
7	Zambia	2013	0.00683674
7	Zambia	2014	0.00825921
7	Zambia	2015	0.00850311
7	Zambia	2016	0.0067518
7	Zambia	2017	0.00740255
7	Zambia	2018	0.00653229
7	Zambia	2019	0.00745993
7	Zambia	2020	0.00527868
7	Zambia	2021	0.00373607
8	Uganda	2001	-0.000443406
8	Uganda	2002	-0.00107759
8	Uganda	2003	-0.000355855
8	Uganda	2004	-0.000821693
8	Uganda	2005	-0.000394889
8	Uganda	2006	-2.59281e-05
8	Uganda	2007	0.00235676
8	Uganda	2008	0.00220245
8	Uganda	2009	0.00279808
8	Uganda	2010	0.00334994
8	Uganda	2011	0.00371158
8	Uganda	2012	0.00347996
8	Uganda	2013	0.00364651
8	Uganda	2014	0.00288328
8	Uganda	2015	0.00329861
8	Uganda	2016	0.00353746
8	Uganda	2017	0.00401265
8	Uganda	2018	0.00550114
8	Uganda	2019	0.00410804
8	Uganda	2020	0.00315996
8	Uganda	2021	0.00431594
9	Mozambique	2001	0.00166043
9	Mozambique	2002	0.00355099
9	Mozambique	2003	0.00272982
9	Mozambique	2004	0.00358596
9	Mozambique	2005	0.00540604
9	Mozambique	2006	0.00372874
9	Mozambique	2007	0.00610963
9	Mozambique	2008	-0.000544498
9	Mozambique	2009	0.00541954
9	Mozambique	2010	-0.000724125
9	Mozambique	2011	0.00558607
9	Mozambique	2012	0.00994593
9	Mozambique	2013	0.0123887
9	Mozambique	2014	0.00476476
9	Mozambique	2015	0.00836763
9	Mozambique	2016	0.00266007
9	Mozambique	2017	0.00042774
9	Mozambique	2018	0.0113003
9	Mozambique	2019	0.00503709
9	Mozambique	2020	0.00185502
9	Mozambique	2021	0.00165521
10	Zimbabwe	2001	0.0121723
10	Zimbabwe	2002	0.00758298
10	Zimbabwe	2003	0.0047809
10	Zimbabwe	2004	0.000773124
10	Zimbabwe	2005	0.0148203
10	Zimbabwe	2006	0.00444617
10	Zimbabwe	2007	0.00285669
10	Zimbabwe	2008	0.00159486
10	Zimbabwe	2009	0.00577243
10	Zimbabwe	2010	0.00258276
10	Zimbabwe	2011	0.00137543
10	Zimbabwe	2012	0.0053154
10	Zimbabwe	2013	0.00455898
10	Zimbabwe	2014	0.00900735
10	Zimbabwe	2015	0.00622723
10	Zimbabwe	2016	0.00269693
10	Zimbabwe	2017	0.00220623
10	Zimbabwe	2018	0.0016984
10	Zimbabwe	2019	0.00315254
10	Zimbabwe	2020	0.00394932
10	Zimbabwe	2021	-1.67555e-06
11	Malawi	2001	0.0132047
11	Malawi	2002	0.00641866
11	Malawi	2003	0.0194049
11	Malawi	2004	0.0114811
11	Malawi	2005	0.0061657
11	Malawi	2006	0.00354233
11	Malawi	2007	0.00536917
11	Malawi	2008	0.0035519
11	Malawi	2009	0.0049661
11	Malawi	2010	0.00656709
11	Malawi	2011	0.014175
11	Malawi	2012	0.00187054
11	Malawi	2013	0.0064704
11	Malawi	2014	0.00703507
11	Malawi	2015	0.00620774
11	Malawi	2016	0.00500867
11	Malawi	2017	0.00133672
11	Malawi	2018	0.00172302
11	Malawi	2019	0.00507199
11	Malawi	2020	0.00433331
11	Malawi	2021	0.00367612
12	Namibia	2001	0.000209158
12	Namibia	2002	0.0009993
12	Namibia	2003	0.000220372
12	Namibia	2004	0.000281859
12	Namibia	2005	6.81251e-05
12	Namibia	2006	-0.000628345
12	Namibia	2007	-0.000423533
12	Namibia	2008	-0.000147163
12	Namibia	2009	-0.000339757
12	Namibia	2010	-0.000321495
12	Namibia	2011	-0.000369814
12	Namibia	2012	-0.00118028
12	Namibia	2013	-0.000933184
12	Namibia	2014	-0.000573583
12	Namibia	2015	-0.000617547
12	Namibia	2016	-0.000467566
12	Namibia	2017	-0.000668293
12	Namibia	2018	-0.000538799
12	Namibia	2019	-0.000425001
12	Namibia	2020	-0.000288163
12	Namibia	2021	-0.000280037
13	Togo	2001	-0.000361282
13	Togo	2002	-0.000209389
13	Togo	2003	-4.2625e-05
13	Togo	2004	-0.000327223
13	Togo	2005	0.000173523
13	Togo	2006	-0.000687726
13	Togo	2007	-0.000476394
13	Togo	2008	6.44467e-05
13	Togo	2009	-0.000717772
13	Togo	2010	-0.000587573
13	Togo	2011	-0.00116893
13	Togo	2012	-0.000405608
13	Togo	2013	-0.000319161
13	Togo	2014	-0.000229246
13	Togo	2015	0.000223476
13	Togo	2016	4.98701e-05
13	Togo	2017	2.7674e-05
13	Togo	2018	0.000276375
13	Togo	2019	0.000403024
13	Togo	2020	0.000261368
13	Togo	2021	0.000143455
14	Angola	2001	-1.1305e-05
14	Angola	2002	-5.69187e-06
14	Angola	2003	-8.05048e-06
14	Angola	2004	-8.86323e-06
14	Angola	2005	-1.43041e-05
14	Angola	2006	-1.55418e-05
14	Angola	2007	-1.6329e-05
14	Angola	2008	-1.95618e-05
14	Angola	2009	-2.22782e-05
14	Angola	2010	-3.64033e-05
14	Angola	2011	-4.54624e-05
14	Angola	2012	-4.23167e-05
14	Angola	2013	-5.39362e-05
14	Angola	2014	-5.09394e-05
14	Angola	2015	0.000551002
14	Angola	2016	2.21485e-05
14	Angola	2017	0.000822826
14	Angola	2018	0.000302374
14	Angola	2019	0.000681477
14	Angola	2020	0.000337752
14	Angola	2021	0.000126262
15	Madagascar	2001	0.000329765
15	Madagascar	2002	-0.000713653
15	Madagascar	2003	-2.39109e-05
15	Madagascar	2004	0.00114166
15	Madagascar	2005	-0.000145924
15	Madagascar	2006	0.00032231
15	Madagascar	2007	3.45178e-06
15	Madagascar	2008	0.00034034
15	Madagascar	2009	0.00157013
15	Madagascar	2010	0.000905752
15	Madagascar	2011	0.00027688
15	Madagascar	2012	0.000429947
15	Madagascar	2013	0.00186725
15	Madagascar	2014	0.000254174
15	Madagascar	2015	-5.27737e-05
15	Madagascar	2016	-0.000863786
15	Madagascar	2017	-0.00108731
15	Madagascar	2018	-0.000880688
15	Madagascar	2019	-0.000410623
15	Madagascar	2020	-0.000459106
15	Madagascar	2021	-0.00070551
16	Tanzania, United Republic of	2001	-7.68291e-06
16	Tanzania, United Republic of	2002	0.000576437
16	Tanzania, United Republic of	2003	0.000254603
16	Tanzania, United Republic of	2004	-1.2487e-06
16	Tanzania, United Republic of	2005	-0.000214975
16	Tanzania, United Republic of	2006	-0.000811723
16	Tanzania, United Republic of	2007	0.00114163
16	Tanzania, United Republic of	2008	-0.000780978
16	Tanzania, United Republic of	2009	-0.00172266
16	Tanzania, United Republic of	2010	-0.00149487
16	Tanzania, United Republic of	2011	-0.00165602
16	Tanzania, United Republic of	2012	-0.00242182
16	Tanzania, United Republic of	2013	0.00470115
16	Tanzania, United Republic of	2014	0.00109577
16	Tanzania, United Republic of	2015	-0.00293086
16	Tanzania, United Republic of	2016	-0.00265388
16	Tanzania, United Republic of	2017	-0.00231167
16	Tanzania, United Republic of	2018	-0.0011664
16	Tanzania, United Republic of	2019	-0.00143428
16	Tanzania, United Republic of	2020	-0.00179903
16	Tanzania, United Republic of	2021	-0.00163146
17	Cameroon	2001	-0.00249638
17	Cameroon	2002	-0.00234564
17	Cameroon	2003	-0.00220759
17	Cameroon	2004	-0.00181828
17	Cameroon	2005	-0.0020253
17	Cameroon	2006	-0.00221334
17	Cameroon	2007	-0.00151184
17	Cameroon	2008	-0.000782197
17	Cameroon	2009	-0.00207403
17	Cameroon	2010	-0.00214172
17	Cameroon	2011	-0.00208256
17	Cameroon	2012	-0.00135043
17	Cameroon	2013	-0.00147232
17	Cameroon	2014	-0.00118633
17	Cameroon	2015	-0.00177645
17	Cameroon	2016	-0.00189112
17	Cameroon	2017	-0.00139376
17	Cameroon	2018	-0.00106552
17	Cameroon	2019	-0.000898566
17	Cameroon	2020	-0.000889422
17	Cameroon	2021	-0.000856739
18	Botswana	2001	-0.000736149
18	Botswana	2002	-0.000104165
18	Botswana	2003	-0.000228806
18	Botswana	2004	-0.000148764
18	Botswana	2005	-0.000165569
18	Botswana	2006	-0.000163029
18	Botswana	2007	-0.000346425
18	Botswana	2008	-0.000235623
18	Botswana	2009	-0.000378264
18	Botswana	2010	-0.000594321
18	Botswana	2011	-0.000292516
18	Botswana	2012	-0.000245752
18	Botswana	2013	-0.000315283
18	Botswana	2014	-0.000222579
18	Botswana	2015	-0.000211002
18	Botswana	2016	-0.000199274
18	Botswana	2017	-0.000130509
18	Botswana	2018	-0.000126296
18	Botswana	2019	-4.35611e-05
18	Botswana	2020	-8.53035e-05
18	Botswana	2021	-4.60626e-05
19	Kenya	2001	-0.00520271
19	Kenya	2002	-0.00131973
19	Kenya	2003	-0.000788659
19	Kenya	2004	-0.00375824
19	Kenya	2005	-0.00402039
19	Kenya	2006	-0.00559029
19	Kenya	2007	-0.00336842
19	Kenya	2008	-0.00170695
19	Kenya	2009	-0.0059012
19	Kenya	2010	-0.00731566
19	Kenya	2011	-0.00455667
19	Kenya	2012	-0.00405885
19	Kenya	2013	-0.00508455
19	Kenya	2014	-0.0033112
19	Kenya	2015	-0.00355118
19	Kenya	2016	-0.00509495
19	Kenya	2017	-0.00502794
19	Kenya	2018	-0.00361354
19	Kenya	2019	-0.00309295
19	Kenya	2020	-0.00377531
19	Kenya	2021	-0.00316029
20	Burkina Faso	2001	-0.000186432
20	Burkina Faso	2002	-0.00022593
20	Burkina Faso	2003	-0.000182972
20	Burkina Faso	2004	-0.000201029
20	Burkina Faso	2005	-0.000135793
20	Burkina Faso	2006	-0.000575221
20	Burkina Faso	2007	-0.000553864
20	Burkina Faso	2008	-0.000436428
20	Burkina Faso	2009	-0.000894339
20	Burkina Faso	2010	-0.000940334
20	Burkina Faso	2011	-0.00104877
20	Burkina Faso	2012	-0.00095846
20	Burkina Faso	2013	-0.00128315
20	Burkina Faso	2014	-0.0010251
20	Burkina Faso	2015	-0.00089974
20	Burkina Faso	2016	-0.00117309
20	Burkina Faso	2017	-0.00108848
20	Burkina Faso	2018	-0.000826309
20	Burkina Faso	2019	-0.000639955
20	Burkina Faso	2020	-0.000576017
20	Burkina Faso	2021	-0.000630875
21	Senegal	2001	-0.000702721
21	Senegal	2002	-0.000532426
21	Senegal	2003	-0.000577182
21	Senegal	2004	-0.000442956
21	Senegal	2005	-0.000352261
21	Senegal	2006	-0.000744117
21	Senegal	2007	-0.00060617
21	Senegal	2008	-0.000357164
21	Senegal	2009	-0.000679727
21	Senegal	2010	-0.000837962
21	Senegal	2011	-0.000809807
21	Senegal	2012	-0.000693083
21	Senegal	2013	-0.000917796
21	Senegal	2014	-0.000679193
21	Senegal	2015	-0.000857928
21	Senegal	2016	-0.000903551
21	Senegal	2017	-0.000711648
21	Senegal	2018	-0.000163136
21	Senegal	2019	-0.000715718
21	Senegal	2020	-0.000711963
21	Senegal	2021	-0.00081569
22	Niger	2001	-0.000173799
22	Niger	2002	-0.000295164
22	Niger	2003	-0.000250161
22	Niger	2004	-0.000190816
22	Niger	2005	-0.000222393
22	Niger	2006	-0.000170099
22	Niger	2007	0.000542645
22	Niger	2008	0.000545025
22	Niger	2009	0.000157795
22	Niger	2010	0.000112216
22	Niger	2011	0.000835339
22	Niger	2012	0.00239043
22	Niger	2013	0.000460279
22	Niger	2014	0.000564679
22	Niger	2015	0.000956217
22	Niger	2016	-0.000526026
22	Niger	2017	-0.000920551
22	Niger	2018	-0.000600461
22	Niger	2019	0.000583277
22	Niger	2020	0.000133607
22	Niger	2021	8.66595e-05
23	Côte d'Ivoire	2001	-0.00720127
23	Côte d'Ivoire	2002	-0.0127302
23	Côte d'Ivoire	2003	-0.00873945
23	Côte d'Ivoire	2004	-0.00631634
23	Côte d'Ivoire	2005	-0.00759727
23	Côte d'Ivoire	2006	-0.0112771
23	Côte d'Ivoire	2007	-0.00783527
23	Côte d'Ivoire	2008	-0.00681274
23	Côte d'Ivoire	2009	-0.011759
23	Côte d'Ivoire	2010	-0.01361
23	Côte d'Ivoire	2011	-0.0137761
23	Côte d'Ivoire	2012	-0.0100441
23	Côte d'Ivoire	2013	-0.00758536
23	Côte d'Ivoire	2014	-0.00854958
23	Côte d'Ivoire	2015	-0.0105477
23	Côte d'Ivoire	2016	-0.0100132
23	Côte d'Ivoire	2017	-0.0116589
23	Côte d'Ivoire	2018	-0.00749748
23	Côte d'Ivoire	2019	-0.0073902
23	Côte d'Ivoire	2020	-0.00893712
23	Côte d'Ivoire	2021	-0.00807981
24	Benin	2001	-0.000978245
24	Benin	2002	-0.000906248
24	Benin	2003	-0.000949077
24	Benin	2004	-0.000822974
24	Benin	2005	-0.000450616
24	Benin	2006	-0.000535725
24	Benin	2007	-0.000139042
24	Benin	2008	-0.000110902
24	Benin	2009	-0.000378565
24	Benin	2010	-0.00108919
24	Benin	2011	-0.000621855
24	Benin	2012	0.000274332
24	Benin	2013	0.000198523
24	Benin	2014	4.35159e-05
24	Benin	2015	-0.000277783
24	Benin	2016	-3.97942e-05
24	Benin	2017	-0.00044627
24	Benin	2018	-0.000561431
24	Benin	2019	-0.000663182
24	Benin	2020	-0.000588139
24	Benin	2021	-0.000463076
25	Tunisia	2001	-0.0026094
25	Tunisia	2002	-0.0019046
25	Tunisia	2003	-0.00174568
25	Tunisia	2004	-0.00290709
25	Tunisia	2005	-0.00322039
25	Tunisia	2006	-0.00463381
25	Tunisia	2007	-0.00275295
25	Tunisia	2008	-0.00246062
25	Tunisia	2009	-0.00285004
25	Tunisia	2010	-0.00293433
25	Tunisia	2011	-0.00251337
25	Tunisia	2012	-0.00290671
25	Tunisia	2013	-0.00253378
25	Tunisia	2014	-0.00155034
25	Tunisia	2015	-0.000897162
25	Tunisia	2016	0.00220411
25	Tunisia	2017	0.00704159
25	Tunisia	2018	0.0061789
25	Tunisia	2019	0.00184008
25	Tunisia	2020	-0.000100478
25	Tunisia	2021	-0.000953739
26	Burundi	2001	0.000111739
26	Burundi	2002	0.000297187
26	Burundi	2003	0.000164654
26	Burundi	2004	0.000437135
26	Burundi	2005	9.32734e-06
26	Burundi	2006	-0.000102186
26	Burundi	2007	0.000585867
26	Burundi	2008	4.34767e-05
26	Burundi	2009	4.94448e-05
26	Burundi	2010	-0.000184365
26	Burundi	2011	-0.000178263
26	Burundi	2012	-0.000182648
26	Burundi	2013	-9.59093e-05
26	Burundi	2014	-0.000107473
26	Burundi	2015	7.61247e-06
26	Burundi	2016	-0.000128719
26	Burundi	2017	-0.000123389
26	Burundi	2018	-8.35451e-05
26	Burundi	2019	-7.88473e-05
26	Burundi	2020	-8.66192e-05
26	Burundi	2021	-6.0647e-05
27	Rwanda	2001	-0.000190275
27	Rwanda	2002	-0.00013382
27	Rwanda	2003	-0.000105698
27	Rwanda	2004	-9.32131e-05
27	Rwanda	2005	-0.000211082
27	Rwanda	2006	-0.000293173
27	Rwanda	2007	-0.000161252
27	Rwanda	2008	-0.000382377
27	Rwanda	2009	-0.0001886
27	Rwanda	2010	-0.000281383
27	Rwanda	2011	-0.000339657
27	Rwanda	2012	-0.000470914
27	Rwanda	2013	0.000309968
27	Rwanda	2014	-8.55191e-05
27	Rwanda	2015	-0.000226385
27	Rwanda	2016	-0.000336367
27	Rwanda	2017	-0.000344222
27	Rwanda	2018	-2.18592e-05
27	Rwanda	2019	0.000911943
27	Rwanda	2020	0.000490742
27	Rwanda	2021	0.00117839
28	Gambia	2001	-8.67984e-05
28	Gambia	2002	-8.78167e-05
28	Gambia	2003	-5.11568e-05
28	Gambia	2004	-6.78771e-05
28	Gambia	2005	-5.78451e-05
28	Gambia	2006	-6.30509e-05
28	Gambia	2007	-5.92546e-05
28	Gambia	2008	-3.94019e-05
28	Gambia	2009	-1.48156e-05
28	Gambia	2010	-3.17471e-06
28	Gambia	2011	0.000185114
28	Gambia	2012	7.99932e-05
28	Gambia	2013	0.000202836
28	Gambia	2014	5.08106e-05
28	Gambia	2015	-2.47481e-05
28	Gambia	2016	0.000217406
28	Gambia	2017	-1.67015e-05
28	Gambia	2018	-2.64256e-07
28	Gambia	2019	2.95662e-05
28	Gambia	2020	1.98724e-05
28	Gambia	2021	1.61342e-05
29	Lesotho	2001	-1.69753e-05
29	Lesotho	2002	-7.68959e-06
29	Lesotho	2003	1.51791e-05
29	Lesotho	2004	-5.6175e-06
29	Lesotho	2005	-4.43896e-06
29	Lesotho	2006	-1.54605e-05
29	Lesotho	2007	-3.78167e-06
29	Lesotho	2008	-2.28016e-06
29	Lesotho	2009	-3.23489e-06
29	Lesotho	2010	-2.1467e-06
29	Lesotho	2011	-5.02916e-06
29	Lesotho	2012	-7.41692e-06
29	Lesotho	2013	-4.10971e-05
29	Lesotho	2014	-5.81293e-05
29	Lesotho	2015	-6.41954e-05
29	Lesotho	2016	-7.76131e-05
29	Lesotho	2017	-7.07175e-05
29	Lesotho	2018	-1.64934e-05
29	Lesotho	2019	-4.31685e-05
29	Lesotho	2020	-8.35749e-05
29	Lesotho	2021	-7.22215e-05
30	Ghana	2001	-0.00280762
30	Ghana	2002	-0.00314342
30	Ghana	2003	-0.00374904
30	Ghana	2004	-0.00377413
30	Ghana	2005	-0.00378414
30	Ghana	2006	-0.00562005
30	Ghana	2007	-0.00323278
30	Ghana	2008	-0.00251656
30	Ghana	2009	-0.00343959
30	Ghana	2010	-0.00317031
30	Ghana	2011	-0.00651903
30	Ghana	2012	-0.00539822
30	Ghana	2013	-0.00371836
30	Ghana	2014	-0.00427016
30	Ghana	2015	-0.00393647
30	Ghana	2016	-0.0064433
30	Ghana	2017	-0.00489952
30	Ghana	2018	-0.00461676
30	Ghana	2019	-0.00347562
30	Ghana	2020	-0.00329726
30	Ghana	2021	-0.00275661
31	Nigeria	2001	-0.00211861
31	Nigeria	2002	-0.00183541
31	Nigeria	2003	-0.0018138
31	Nigeria	2004	-0.00147312
31	Nigeria	2005	-0.00220487
31	Nigeria	2006	-0.00217836
31	Nigeria	2007	-0.00122496
31	Nigeria	2008	-0.0014478
31	Nigeria	2009	-0.00238465
31	Nigeria	2010	-0.00294002
31	Nigeria	2011	-0.0030338
31	Nigeria	2012	-0.00294087
31	Nigeria	2013	-0.0011872
31	Nigeria	2014	-0.00188827
31	Nigeria	2015	-0.00185716
31	Nigeria	2016	-0.00231622
31	Nigeria	2017	-0.00263477
31	Nigeria	2018	-0.00186279
31	Nigeria	2019	-0.00150734
31	Nigeria	2020	-0.00151188
31	Nigeria	2021	-0.00134588
32	Cabo Verde	2001	-6.44326e-07
32	Cabo Verde	2002	-1.23586e-06
32	Cabo Verde	2003	-8.68594e-07
32	Cabo Verde	2004	-9.94514e-07
32	Cabo Verde	2005	-1.82682e-06
32	Cabo Verde	2006	-8.81652e-06
32	Cabo Verde	2007	-1.59747e-06
32	Cabo Verde	2008	-2.34674e-06
32	Cabo Verde	2009	-2.23144e-06
32	Cabo Verde	2010	-1.871e-06
32	Cabo Verde	2011	-1.75797e-06
32	Cabo Verde	2012	-8.23594e-06
32	Cabo Verde	2013	-2.12517e-06
32	Cabo Verde	2014	-4.40716e-06
32	Cabo Verde	2015	-3.34332e-06
32	Cabo Verde	2016	-1.47284e-06
32	Cabo Verde	2017	-1.56484e-06
32	Cabo Verde	2018	-1.38128e-06
32	Cabo Verde	2019	-7.44216e-07
32	Cabo Verde	2020	-1.602e-06
32	Cabo Verde	2021	-1.51119e-06
33	Ethiopia	2001	-0.000821303
33	Ethiopia	2002	0.00305711
33	Ethiopia	2003	0.00139328
33	Ethiopia	2004	-0.0015064
33	Ethiopia	2005	-0.00122385
33	Ethiopia	2006	-0.00331785
33	Ethiopia	2007	-0.000478004
33	Ethiopia	2008	-0.00103419
33	Ethiopia	2009	-0.00167486
33	Ethiopia	2010	-0.00465435
33	Ethiopia	2011	-0.00470281
33	Ethiopia	2012	-0.00468665
33	Ethiopia	2013	-0.00579007
33	Ethiopia	2014	-0.00533351
33	Ethiopia	2015	-0.00528382
33	Ethiopia	2016	-0.00248636
33	Ethiopia	2017	-0.00234139
33	Ethiopia	2018	-0.00124897
33	Ethiopia	2019	-0.00212762
33	Ethiopia	2020	-0.00233075
33	Ethiopia	2021	-0.0022739
34	Gabon	2001	0.000395893
34	Gabon	2002	0.000324219
34	Gabon	2003	0.000544399
34	Gabon	2004	0.000226882
34	Gabon	2005	0.00116116
34	Gabon	2006	0.000139799
34	Gabon	2007	0.000128128
34	Gabon	2008	7.94328e-05
34	Gabon	2009	0.000119205
34	Gabon	2010	3.87407e-05
34	Gabon	2011	-0.000173523
34	Gabon	2012	-0.000109858
34	Gabon	2013	-9.38498e-05
34	Gabon	2014	-4.89246e-05
34	Gabon	2015	-4.25712e-05
34	Gabon	2016	-3.64611e-05
34	Gabon	2017	-5.23026e-05
34	Gabon	2018	-3.56561e-05
34	Gabon	2019	-1.98882e-05
34	Gabon	2020	-5.77781e-05
34	Gabon	2021	-4.42117e-05
