# Supplementary material for: Trade and competitiveness of African sugar exports
Source: Frontiers journal article supplement (doi:10.3389/fsufs.2023.1304383), 2023-12-15
Supplement: Table_1.DOCX [file Table_1.DOCX]

Supplementary Material

. **Appendices**

**Table A1: Descriptive Statistics of the least competitive African sugar exporting countries**

| **Country** | **Mean NRCA** | | **Minimum** | | **Maximum** | | **Sigma** | |
| --- | --- | --- | --- | --- | --- | --- | --- | --- |
| Cabo Verde | | -2.40853E-06 | | -8.81652E-06 | | -6.44326E-07 | | 2.20726E-06 | |
| Lesotho | | -2.79097E-05 | | -8.35749E-05 | | 1.51791E-05 | | 3.09637E-05 | |
| Rwanda | | -4.6417E-05 | | -0.000470914 | | 0.001178386 | | 0.000426095 | |
| Togo | | -0.000186177 | | -0.001168927 | | 0.000403024 | | 0.000401012 | |
| Botswana | | -0.000239012 | | -0.000736149 | | -4.35611E-05 | | 0.000169827 | |
| Namibia | | -0.000305893 | | -0.001180282 | | 0.0009993 | | 0.000470814 | |
| Benin | | -0.000452655 | | -0.001089194 | | 0.000274332 | | 0.000387385 | |
| Senegal | | -0.000657724 | | -0.000917796 | | -0.000163136 | | 0.000196067 | |
| Burkina Faso | | -0.000689633 | | -0.001283148 | | -0.000135793 | | 0.000361338 | |
| Tanzania | | -0.000727141 | | -0.002930864 | | 0.004701154 | | 0.001722152 | |
| Tunisia | | -0.00105761 | | -0.004633809 | | 0.007041585 | | 0.003016423 | |
| Cameroon | | -0.001641883 | | -0.002496381 | | -0.000782197 | | 0.000546228 | |
| Nigeria | | -0.001986085 | | -0.003033803 | | -0.0011872 | | 0.000567383 | |
| Ethiopia | | -0.002326965 | | -0.005790069 | | 0.003057107 | | 0.002248531 | |
| Kenya | | -0.003966651 | | -0.007315663 | | -0.000788659 | | 0.001547926 | |
| Ghana | | -0.004027094 | | -0.006519031 | | -0.002516557 | | 0.001154294 | |
| Côte d'Ivoire | | -0.009426588 | | -0.013776107 | | -0.006316338 | | 0.002291878 | |

**Table A2: Mean NRCA Indices of Top World Sugar Exporting Countries: 2001 to 2021**

| **Country** | **2001-2003** | **2004-2006** | **2007-2009** | **2010-2012** | **2013-2015** | **2016-2018** | **2019-2021** |
| --- | --- | --- | --- | --- | --- | --- | --- |
| Belgium | -0.011873 | -0.003624 | -0.035240 | -0.046690 | -0.033583 | -0.027063 | -0.022807 |
| Brazil | 0.400201 | 0.536572 | 0.561492 | 0.941274 | 0.591914 | 0.581239 | 0.405837 |
| France | 0.088857 | 0.057115 | 0.032881 | -0.017240 | -0.007403 | 0.001824 | -0.005558 |
| Germany | -0.021600 | -0.042543 | -0.069080 | -0.102623 | -0.071700 | -0.057117 | -0.032300 |
| Guatemala | 0.042070 | 0.030903 | 0.037500 | 0.049833 | 0.060513 | 0.047847 | 0.032698 |
| India | 0.048217 | 0.005569 | 0.052503 | 0.067695 | 0.029466 | 0.040971 | 0.134956 |
| Mexico | -0.025070 | -0.011846 | 0.002568 | 0.026955 | 0.035557 | 0.008081 | 0.008449 |
| Netherlands | -0.133367 | -0.137197 | -0.131067 | -0.170103 | -0.099280 | -0.099300 | -0.078583 |
| Poland | 0.001540 | 0.007570 | -0.010250 | -0.014557 | -0.015833 | -0.016700 | -0.015687 |
| Thailand | 0.127848 | 0.071387 | 0.114638 | 0.189282 | 0.156639 | 0.135731 | 0.103076 |
